# Supplementary material
Source: Elsevier journal article supplement (https://www.sciencedirect.com/science/article/pii/S0001731015003397)
Supplement: mmc1 [file S0001731015003397:mmc1.docx]

Investigadores pertenecientes al Grupo de trabajo estudio Latent:

Francisco Manuel Allegue Rodríguez, Jose María Fabeiro Gómez, Lidia Comba Pérez, Jose Luis Caeiro Castelao, Juan Ramón García Gavín, María Dolores Sánchez Aguilar, Celia Posada García, Manuel Angel Rodríguez Prieto, Beatriz González Sixto, Jose Antonio Manjón Haces, Miren Josune Michelena Eceiza, Raquel Santesteban Muruzábal, Rosario Fátima Lafuente Urrez, Marta Lorda Espés, Julio Pérez Pelegay, Iñigo Martinez de Lizarduy, Olatz Lasa Elguezua, Andrés Palacios Abufón, Maria Victoria Almeida Llamas, María del Pilar Gómez Centeno, Eduardo Fonseca Capdevilla, Fernando Valdés Tascón, Cristina de las Heras Sotos, Oscar Manuel Suárez Amor, Daniel González Vilas, Aquilina Ramírez Santos, Benigno Monteagudo Sánchez, Luís Rodríguez González, Eloy Rodriguez Díaz, César Cosme Álvarez Cuesta, Rafael Botella Estrada, Miguel Ángel Navarro Mira, Rafael Carmena Ramón, José Maria Ricart Vaya, Juan Antonio Sánchez Gaviño, Ana Pitarch Archélos, Francisco José Albero Blanes, Manuel Moragón Gordón, Julia Miralles Botella, María Pérez Crespo, Fco. Javier Mataix Díaz, María del Mar Blanes Martínez, Luis Miguel Gallego Torrome, Luis Vitaller Gil, Angel López Ávila, Amparo Peña García, José Frías Iniesta, Antonio Hernández-Gil Bordallo, Jesús Hernández-Gil Sánchez, José Suárez Hernández, Cristina Rodriguez García, Juan Ruiz León, Sara Dorta Alom, Fernando Rodríguez García, Francisco Guimerá Martín Neda, Sorahaya González Hernández, Gregorio Carretero Hernández, Javier Hernández Santana, Diana Irene Islas Norris, Dunia Luján Rodríguez, María Noelia Hernández Hernández, Diana Patricia Ruiz Genao, Alejandro Fueyo Casado, Roberto Marengo Otero, Javier Pedraz Muñoz, Montserrat Fernández-Guarino, Gastón Roustan Gullón, Maria Pilar de Pablo Martín, Mª Sonsoles Rojo Sánchez, Inés Gonzalo González, Isabel Martín González, Ricardo Valverde Garrido, Sara Ibañes del Agua, Ana Belén Piteiro Bermejo, Patricia Abajo Blanco, Ofelia Baniandrés Rodríguez, Constanza Bahillo Monné, Cristina Schoendorff Ortega, Pablo Bautista Martínez, Esther de Eusebio Murillo, Emilia Fernández López, Susana Blanco Barrios, Alfonso González Morán, Tomás Pozo Román, María Núñez Cabezón, Antonio González López, Laura Sánchez Velicia, Jordi Mollet Sánchez, Gloria Aparicio Español, Maria Antonia Pol Reyes, Francesca Corella Vicente, Manuel Formigón Roig, Dolors Vila Serra, Maria Carmen Díaz Sarrió, Xavier García Navarro, Miguel Viñas Arenas, Jesús González Rupérez, Fernando Gallardo Hernández, Marta Ferrán Farrés, Jose Manuel Carrascosa Carrillo, Maria Teresa Robles Portillo, Natalia Dolores Seguí Planelles, Victor Echevarría Pascuchi, Carlos Muñoz Santos, Mercé Alsina Gibert, Patricia Serrano Grau, Josep María Vives Sendra, Cristina Nadal Lladó, Rosa María Taberner Ferrer, Maria Elisabet Parera Amer, Vicenç Rocamora Durán, Yolanda Gilaberte Calzada, Rosa Inés García Felipe, Estrella Simal Gil, Jose Juan Ocaña Luengo, Joaquín Mut Oltra, María Socorro Ocaña Wilhelmi, Juan Márquez Enríquez, Irene López Barragán, Carmen Carranza Romero, Carlos García Blesa, Isabel María Coronel Pérez, Elena Rodriguez Rey, Jerónimo Escudero Ordoñez, Amalia Pérez Gil, David Moreno Ramírez, Francisco Peral Rubio, Lara Ferrándiz Pulido, Julián Conejo-Mir Sánchez, Lola Conejo-Mir Vázquez, Manuel Galán Gutiérrez, Ricardo Ruiz-Villaverde, Antonio José Vélez García-Nieto, Paloma Nogueras Morillas, Francisco Benavente Ortiz, Jose Carlos Ruiz Carrascosa, Antonio Javier Chaves Álvarez.
